# Supplementary material
Source: Springer Nature journal article supplement (https://www.springermedizin.de/resource/supplementary/12876_2010_512_MOESM2_ESM.pdf/9436886)

**IPH**

**LC**

**Control**

**eNOS**

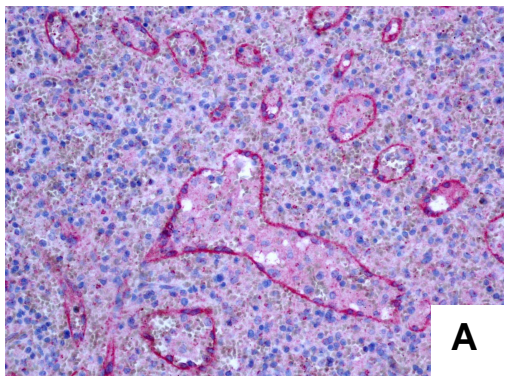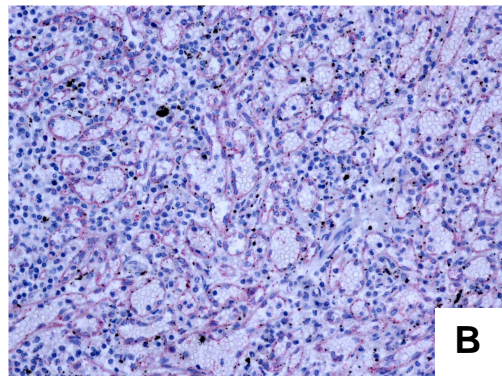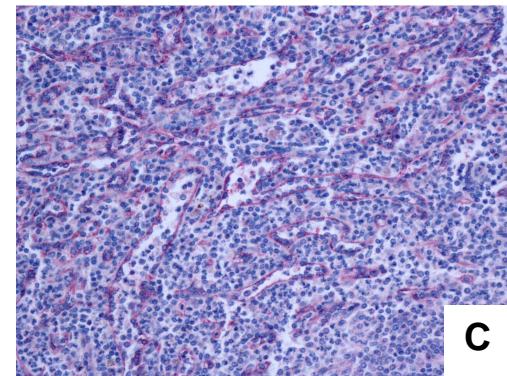

**VCAM-1**

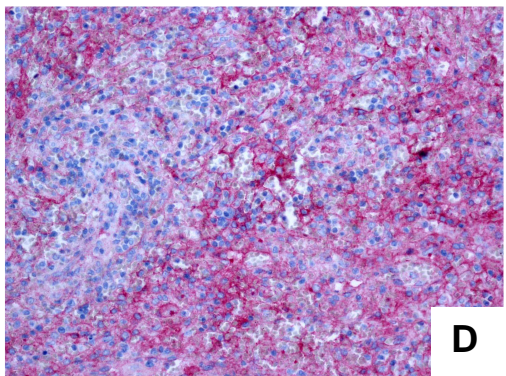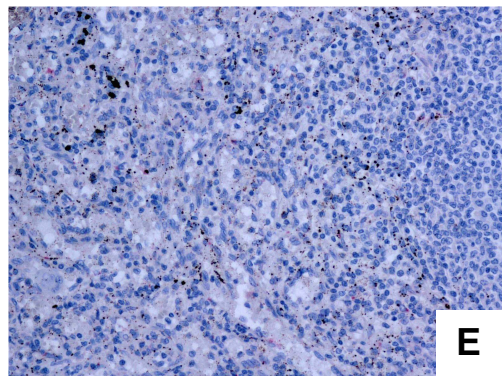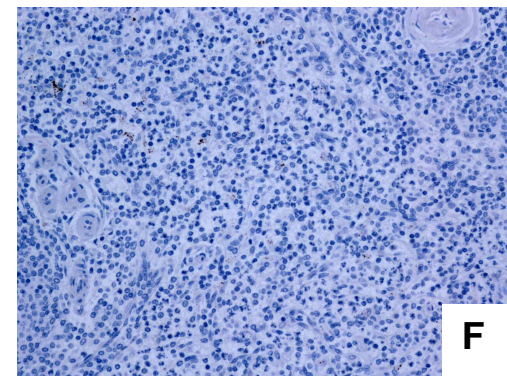

**ET-1**

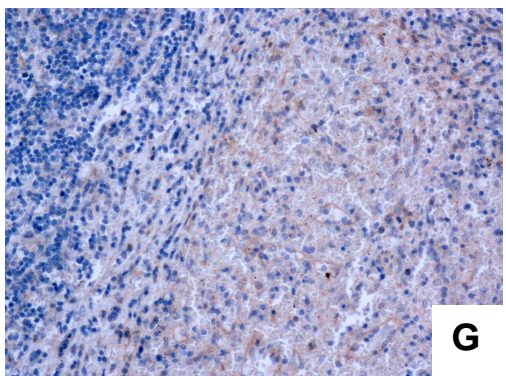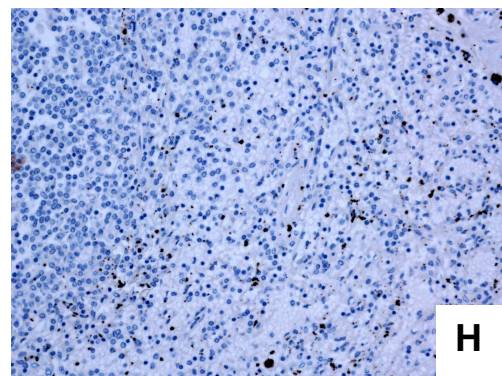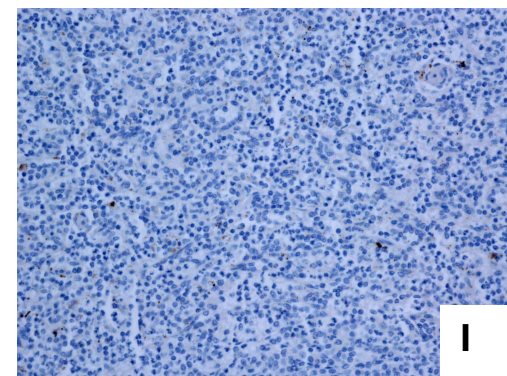

Supplement: MOESM2 [file 9436886]
